# Supplementary material for: Depicting Safety Profile of TAAR1 Agonist Ulotaront Relative to Reactions Anticipated for a Dopamine D2-Based Pharmacological Class in FAERS
Source: Springer Nature journal article supplement (doi:10.1007/s40261-021-01094-7), 2021-11-09
Supplement: MOESM1 [file 24114138]

**Supplementary material**

**Journal: Clinical Drug Investigation**

**Depicting safety profile of TAAR1 agonist ulotaront relative to reactions anticipated for a  
dopamine D2-based pharmacological class in FAERS**

Seth C. Hopkins, Ajay Ogirala, MaryAlice Worden, Kenneth S. Koblan

Sunovion Pharmaceuticals Inc., Marlborough, MA

**Corresponding Author:**

Seth C. Hopkins, PhD

Sunovion Pharmaceuticals

84 Waterford Drive

Marlborough, MA 01752 USA

seth.hopkins @ sunovion.com

Antipsychotic Class Effect Query. A rank-ordered list of PTs identified for a pool of 30 antipsychotics, as ranked by their aggregated disproportionality as reported in FAERS, using the Empirical Bayes Geometric Mean (EBGM50) for PTs having lower 5% confidence limit above 3 (EBGM05 > 3).

| PT                                           | EBGM   | EBGM05 | EBGM95 |
|----------------------------------------------|--------|--------|--------|
| POST-INJECTION DELIRIUM SEDATION SYNDROME    | 25.603 | 23.730 | 27.592 |
| ANTIPSYCHOTIC DRUG LEVEL DECREASED           | 25.223 | 22.617 | 28.061 |
| BENIGN ETHNIC NEUTROPENIA                    | 25.133 | 17.237 | 34.859 |
| RABBIT SYNDROME                              | 24.181 | 19.910 | 29.123 |
| HYPERPROLACTINAEMIA                          | 24.130 | 23.551 | 24.721 |
| MALIGNANT CATATONIA                          | 24.105 | 19.024 | 30.131 |
| ABNORMAL WEIGHT GAIN                         | 23.569 | 23.176 | 23.969 |
| BANKRUPTCY                                   | 23.032 | 21.088 | 25.115 |
| COMPULSIVE SEXUAL BEHAVIOUR                  | 22.252 | 20.735 | 23.854 |
| ANTIPSYCHOTIC DRUG LEVEL BELOW THERAPEUTIC   | 21.878 | 19.960 | 23.938 |
| COMPULSIVE HOARDING                          | 21.798 | 19.556 | 24.233 |
| PSEUDOGYNAECOMASTIA                          | 21.706 | 12.078 | 32.375 |
| ANTIPSYCHOTIC DRUG LEVEL INCREASED           | 21.672 | 20.675 | 22.707 |
| SCHIZOAFFECTIVE DISORDER                     | 21.056 | 19.840 | 22.330 |
| NEUROLEPTIC MALIGNANT SYNDROME               | 20.821 | 20.434 | 21.214 |
| BLOOD PROLACTIN ABNORMAL                     | 20.686 | 18.461 | 23.108 |
| DIFFERENTIAL WHITE BLOOD CELL COUNT ABNORMAL | 20.271 | 19.135 | 21.458 |
| SCHIZOPHRENIA                                | 20.154 | 19.699 | 20.617 |
| GYNAECOMASTIA                                | 20.090 | 19.876 | 20.307 |
| ANTIPSYCHOTIC DRUG LEVEL ABOVE THERAPEUTIC   | 19.627 | 18.002 | 21.360 |
| GRANULOCYTOPENIA                             | 19.416 | 18.880 | 19.963 |
| HOMELESS                                     | 19.232 | 17.229 | 21.397 |
| PSYCHIATRIC DECOMPENSATION                   | 19.035 | 17.827 | 20.306 |
| REBOUND PSYCHOSIS                            | 18.901 | 14.478 | 23.787 |
| EXPOSURE TO CONTAMINATED DEVICE              | 18.281 | 15.712 | 21.087 |
| SCHIZOAFFECTIVE DISORDER DEPRESSIVE TYPE     | 18.224 | 9.226  | 30.457 |
| PSYCHOTIC SYMPTOM                            | 18.200 | 16.826 | 19.655 |
| BLOOD PROLACTIN INCREASED                    | 17.450 | 16.925 | 17.988 |
| DIVORCED                                     | 17.174 | 15.434 | 19.040 |
| SHOPLIFTING                                  | 17.169 | 15.001 | 19.519 |
| COGWHEEL RIGIDITY                            | 16.879 | 15.510 | 18.332 |
| COMPULSIVE SHOPPING                          | 16.749 | 15.870 | 17.664 |
| ANOSOGNOSIA                                  | 16.712 | 14.026 | 19.666 |
| PAROXYSMAL PERCEPTUAL ALTERATION             | 16.624 | 8.653  | 28.759 |
| PSYCHOSEXUAL DISORDER                        | 16.475 | 14.152 | 19.016 |
| NEUROLEPTIC-INDUCED DEFICIT SYNDROME         | 16.410 | 6.677  | 36.189 |

|                                                 |        |        |        |
|-------------------------------------------------|--------|--------|--------|
| GALACTORRHOEA                                   | 16.368 | 15.998 | 16.744 |
| SCHIZOAFFECTIVE DISORDER BIPOLAR TYPE           | 16.343 | 12.482 | 20.794 |
| REFUSAL OF EXAMINATION                          | 16.331 | 12.136 | 21.242 |
| PLEUROTHOTONUS                                  | 16.249 | 14.777 | 17.822 |
| ELECTROCONVULSIVE THERAPY                       | 15.238 | 11.218 | 20.319 |
| METABOLIC SYNDROME                              | 14.756 | 13.770 | 15.797 |
| CATATONIA                                       | 14.501 | 13.951 | 15.068 |
| AKATHISIA                                       | 14.464 | 14.154 | 14.780 |
| OBESITY                                         | 13.686 | 13.364 | 14.014 |
| OROMANDIBULAR DYSTONIA                          | 13.677 | 12.079 | 15.473 |
| VEIN OF GALEN ANEURYSMAL MALFORMATION           | 13.614 | 6.159  | 32.156 |
| GAMBLING DISORDER                               | 13.413 | 12.893 | 13.950 |
| DIABETIC COMA                                   | 13.019 | 12.440 | 13.619 |
| POLYDIPSIA PSYCHOGENIC                          | 12.922 | 10.467 | 16.046 |
| MEIGE'S SYNDROME                                | 12.620 | 9.271  | 17.669 |
| GAMBLING                                        | 12.449 | 11.507 | 13.455 |
| WATER INTOXICATION                              | 12.299 | 11.073 | 13.644 |
| BLUNTED AFFECT                                  | 12.296 | 10.888 | 13.868 |
| PARKINSONISM                                    | 12.104 | 11.716 | 12.503 |
| NEUTROPHIL COUNT INCREASED                      | 11.963 | 11.607 | 12.328 |
| WAXY FLEXIBILITY                                | 11.950 | 9.658  | 14.848 |
| SPASMODIC DYSPHONIA                             | 11.894 | 9.796  | 14.462 |
| OCULOGYRIC CRISIS                               | 11.881 | 11.276 | 12.512 |
| CAMPTOCORMIA                                    | 11.595 | 9.177  | 14.734 |
| NEUTROPHILIA                                    | 11.466 | 10.879 | 12.079 |
| THEFT                                           | 11.087 | 9.954  | 12.326 |
| SCHIZOPHRENIFORM DISORDER                       | 10.694 | 9.623  | 11.861 |
| PERSECUTORY DELUSION                            | 10.592 | 9.886  | 11.337 |
| HALLUCINATION, AUDITORY                         | 10.562 | 10.290 | 10.839 |
| PARKINSON'S DISEASE PSYCHOSIS                   | 10.512 | 7.453  | 15.276 |
| DERMATILLOMANIA                                 | 10.484 | 9.147  | 11.980 |
| PROTRUSION TONGUE                               | 10.471 | 9.234  | 11.842 |
| WITHDRAWAL CATATONIA                            | 10.399 | 7.445  | 14.836 |
| OBSESSIVE-COMPULSIVE DISORDER                   | 10.348 | 9.998  | 10.708 |
| SOLILOQUY                                       | 10.288 | 9.148  | 11.541 |
| DRUG MONITORING PROCEDURE INCORRECTLY PERFORMED | 10.198 | 8.611  | 12.024 |
| SOMATIC SYMPTOM DISORDER OF PREGNANCY           | 10.169 | 7.605  | 13.612 |
| TRICHOTILLOMANIA                                | 10.158 | 8.988  | 11.449 |
| SALIVARY HYPERSECRETION                         | 10.096 | 9.805  | 10.393 |
| PSYCHIATRIC EVALUATION                          | 10.001 | 7.672  | 12.980 |
| TOBACCO INTERACTION                             | 9.921  | 6.734  | 15.192 |

|                                                 |       |       |        |
|-------------------------------------------------|-------|-------|--------|
| SEDATION COMPLICATION                           | 9.897 | 8.862 | 11.028 |
| SEXUALLY TRANSMITTED DISEASE                    | 9.865 | 8.478 | 11.433 |
| HYGROMA COLLI                                   | 9.849 | 6.214 | 17.408 |
| REDUCED FACIAL EXPRESSION                       | 9.793 | 8.916 | 10.737 |
| NEUROPSYCHIATRIC SYMPTOMS                       | 9.784 | 8.589 | 11.110 |
| NEGLECT OF PERSONAL APPEARANCE                  | 9.730 | 7.892 | 11.917 |
| SYDENHAM'S CHOREA                               | 9.694 | 6.616 | 14.562 |
| ACETONAEMIA                                     | 9.670 | 7.746 | 11.988 |
| PARKINSONIAN REST TREMOR                        | 9.596 | 7.570 | 12.072 |
| BLOOD PROLACTIN DECREASED                       | 9.561 | 7.579 | 11.969 |
| DROOLING                                        | 9.559 | 9.165 | 9.965  |
| MUTISM                                          | 9.556 | 8.732 | 10.441 |
| GRANDIOSITY                                     | 9.555 | 8.203 | 11.083 |
| ANTIPSYCHOTIC DRUG LEVEL                        | 9.546 | 5.320 | 21.770 |
| PSYCHOTIC DISORDER                              | 9.383 | 9.223 | 9.545  |
| WELLENS' SYNDROME                               | 9.382 | 5.060 | 22.897 |
| SOPOR                                           | 9.370 | 9.010 | 9.742  |
| INSULIN-REQUIRING TYPE 2 DIABETES MELLITUS      | 9.290 | 7.922 | 10.844 |
| DELUSION                                        | 9.226 | 8.983 | 9.474  |
| DELUSION OF GRANDEUR                            | 9.155 | 7.732 | 10.783 |
| SEXUALLY INAPPROPRIATE BEHAVIOUR                | 9.083 | 7.614 | 10.772 |
| DELUSION OF REFERENCE                           | 9.065 | 6.962 | 11.683 |
| BORDERLINE PERSONALITY DISORDER                 | 9.014 | 7.852 | 10.309 |
| OBSESSIVE-COMPULSIVE SYMPTOM                    | 9.011 | 7.101 | 11.327 |
| COTARD'S SYNDROME                               | 8.961 | 6.196 | 12.890 |
| EXHIBITIONISM                                   | 8.912 | 6.325 | 12.428 |
| TONGUE MOVEMENT DISTURBANCE                     | 8.904 | 7.785 | 10.147 |
| MANIA                                           | 8.860 | 8.651 | 9.072  |
| SOMATIC DELUSION                                | 8.857 | 7.281 | 10.699 |
| MUSCLE RIGIDITY                                 | 8.855 | 8.582 | 9.136  |
| SUSPICIOUSNESS                                  | 8.847 | 7.719 | 10.104 |
| HYPERINSULINISM                                 | 8.836 | 6.833 | 11.303 |
| COMA BLISTER                                    | 8.822 | 6.050 | 12.773 |
| DELUSION OF REPLACEMENT                         | 8.780 | 6.283 | 12.115 |
| HYPERGLYCAEMIC HYPEROSMOLAR NONKETOTIC SYNDROME | 8.750 | 7.804 | 9.786  |
| PSEUDOPHAECHROMOCYTOMA                          | 8.667 | 5.955 | 12.480 |
| RETINAL COLOBOMA                                | 8.664 | 6.011 | 12.339 |
| DIABETIC HYPEROSMOLAR COMA                      | 8.659 | 7.502 | 9.954  |
| DEMENTIA WITH LEWY BODIES                       | 8.516 | 7.383 | 9.784  |
| PARKINSONIAN GAIT                               | 8.515 | 7.480 | 9.660  |
| PRIAPISM                                        | 8.441 | 8.061 | 8.835  |

|                                   |       |       |        |
|-----------------------------------|-------|-------|--------|
| TYPE 1 DIABETES MELLITUS          | 8.434 | 8.057 | 8.825  |
| BIPOLAR DISORDER                  | 8.427 | 8.155 | 8.705  |
| HUNTINGTON'S DISEASE              | 8.415 | 7.115 | 9.897  |
| HYPERSEXUALITY                    | 8.385 | 7.690 | 9.129  |
| INTERMITTENT EXPLOSIVE DISORDER   | 8.364 | 6.292 | 10.968 |
| LOOSE ASSOCIATIONS                | 8.364 | 6.076 | 11.334 |
| LACTATION DISORDER                | 8.325 | 7.176 | 9.615  |
| RESTING TREMOR                    | 8.304 | 7.015 | 9.774  |
| PERSONAL RELATIONSHIP ISSUE       | 8.295 | 7.206 | 9.511  |
| IMPRISONMENT                      | 8.263 | 7.508 | 9.077  |
| RESPIRATORY DYSKINESIA            | 8.195 | 5.800 | 11.375 |
| ELECTROCARDIOGRAM J WAVE          | 8.145 | 4.858 | 14.221 |
| BIPOLAR I DISORDER                | 8.068 | 7.539 | 8.626  |
| EXTRAPYRAMIDAL DISORDER           | 8.057 | 7.909 | 8.206  |
| EXCESSIVE MASTURBATION            | 8.053 | 6.272 | 10.222 |
| RETINAL PIGMENTATION              | 8.036 | 6.874 | 9.348  |
| DIABETES WITH HYPEROSMOLARITY     | 8.004 | 5.530 | 11.357 |
| PYROMANIA                         | 7.988 | 6.147 | 10.251 |
| HYPOMANIA                         | 7.972 | 7.522 | 8.443  |
| GESTATIONAL DIABETES              | 7.948 | 7.512 | 8.403  |
| ACTIVATION SYNDROME               | 7.942 | 6.647 | 9.429  |
| IDEAS OF REFERENCE                | 7.854 | 5.644 | 10.729 |
| INTENTIONAL SELF-INJURY           | 7.826 | 7.622 | 8.035  |
| ANTICHOLINERGIC SYNDROME          | 7.825 | 7.099 | 8.609  |
| RHESUS INCOMPATIBILITY            | 7.761 | 6.139 | 9.708  |
| EMOTIONAL POVERTY                 | 7.758 | 6.921 | 8.673  |
| CONGENITAL THROMBOCYTOPENIA       | 7.722 | 4.882 | 11.967 |
| STEREOTYPY                        | 7.682 | 6.774 | 8.683  |
| OVARIAN GERM CELL CANCER STAGE II | 7.654 | 3.600 | 26.094 |
| OBSTRUCTIVE DEFAECATION           | 7.610 | 4.903 | 11.525 |
| PRE-EXISTING DISEASE              | 7.598 | 6.530 | 8.799  |
| ECTRODACTYLY                      | 7.563 | 5.234 | 10.681 |
| ALCOHOLIC PANCREATITIS            | 7.545 | 5.910 | 9.523  |
| SOMATIC HALLUCINATION             | 7.515 | 5.046 | 10.915 |
| ECHOPRAXIA                        | 7.511 | 5.245 | 10.520 |
| DISINHIBITION                     | 7.502 | 6.822 | 8.234  |
| SOMNOLENCE NEONATAL               | 7.492 | 6.037 | 9.212  |
| PSYCHOTIC BEHAVIOUR               | 7.461 | 6.618 | 8.387  |
| EOSINOPENIA                       | 7.456 | 4.948 | 10.944 |
| DISSOCIATIVE IDENTITY DISORDER    | 7.431 | 5.806 | 9.401  |
| THOUGHT BROADCASTING              | 7.413 | 4.515 | 11.891 |

|                                             |       |       |        |
|---------------------------------------------|-------|-------|--------|
| POLYDIPSIA                                  | 7.371 | 6.967 | 7.793  |
| INTRUSIVE THOUGHTS                          | 7.368 | 6.043 | 8.913  |
| PRESSURE OF SPEECH                          | 7.354 | 6.383 | 8.440  |
| DELUSIONAL PERCEPTION                       | 7.323 | 6.077 | 8.765  |
| TORTICOLLIS                                 | 7.311 | 6.801 | 7.851  |
| BRADYKINESIA                                | 7.306 | 6.793 | 7.850  |
| SECONDARY TIC                               | 7.273 | 4.191 | 12.496 |
| EOSINOPHIL COUNT DECREASED                  | 7.253 | 6.496 | 8.078  |
| BINGE EATING                                | 7.237 | 6.348 | 8.222  |
| BIPOLAR II DISORDER                         | 7.219 | 5.877 | 8.793  |
| ACUTE PSYCHOSIS                             | 7.166 | 6.612 | 7.756  |
| ECHOLALIA                                   | 7.160 | 5.652 | 8.973  |
| KETOACIDOSIS                                | 7.126 | 6.833 | 7.429  |
| ALCOHOL DETOXIFICATION                      | 7.096 | 5.036 | 9.784  |
| AMIMIA                                      | 7.096 | 5.036 | 9.784  |
| RAPID EYE MOVEMENT SLEEP BEHAVIOUR DISORDER | 7.090 | 5.341 | 9.268  |
| TACHYPHRENIA                                | 7.070 | 6.609 | 7.556  |
| METABOLIC DISORDER                          | 7.056 | 6.697 | 7.431  |
| HOMOSEXUALITY                               | 7.054 | 4.564 | 10.571 |
| CYP2D6 POLYMORPHISM                         | 7.052 | 4.320 | 11.138 |
| IMPULSIVE BEHAVIOUR                         | 6.941 | 6.518 | 7.385  |
| TARDIVE DYSKINESIA                          | 6.892 | 6.753 | 7.034  |
| CYCLOTHYMIC DISORDER                        | 6.882 | 5.185 | 8.995  |
| DYSTONIA                                    | 6.878 | 6.714 | 7.046  |
| IMPULSE-CONTROL DISORDER                    | 6.867 | 6.277 | 7.501  |
| DIABETIC GASTROPARESIS                      | 6.857 | 5.722 | 8.163  |
| LENTICULAR PIGMENTATION                     | 6.853 | 4.661 | 9.808  |
| BREAST DISCHARGE                            | 6.847 | 6.290 | 7.443  |
| TOURETTE'S DISORDER                         | 6.837 | 5.988 | 7.780  |
| DELUSIONAL DISORDER, UNSPECIFIED TYPE       | 6.826 | 5.936 | 7.818  |
| DIABETIC GASTROPATHY                        | 6.814 | 4.412 | 10.185 |
| ANTIDEPRESSANT DRUG LEVEL INCREASED         | 6.796 | 5.364 | 8.515  |
| ANTISOCIAL PERSONALITY DISORDER             | 6.762 | 4.953 | 9.062  |
| TONGUE SPASM                                | 6.761 | 5.546 | 8.179  |
| MYOCARDITIS                                 | 6.748 | 6.454 | 7.053  |
| COMPULSIONS                                 | 6.730 | 5.758 | 7.828  |
| NEURONAL MIGRATION DISORDER                 | 6.692 | 3.782 | 11.431 |
| DIABETIC NEUROPATHY                         | 6.689 | 6.346 | 7.046  |
| CONSTRICTED AFFECT                          | 6.679 | 4.496 | 9.644  |
| VICTIM OF ABUSE                             | 6.672 | 5.153 | 8.525  |
| BODY MASS INDEX INCREASED                   | 6.667 | 5.873 | 7.543  |

|                                           |       |       |        |
|-------------------------------------------|-------|-------|--------|
| POOR PERSONAL HYGIENE                     | 6.653 | 5.570 | 7.898  |
| PORIOMANIA                                | 6.632 | 5.123 | 8.475  |
| HYPERKINESIA                              | 6.588 | 5.960 | 7.268  |
| NEGATIVISM                                | 6.556 | 5.734 | 7.470  |
| TYPE 2 DIABETES MELLITUS                  | 6.543 | 6.403 | 6.685  |
| VISUOSPATIAL DEFICIT                      | 6.469 | 3.982 | 10.100 |
| FLIGHT OF IDEAS                           | 6.465 | 5.557 | 7.487  |
| TRIMETHYLAMINURIA                         | 6.439 | 3.319 | 12.426 |
| PSYCHOMOTOR RETARDATION                   | 6.418 | 5.899 | 6.972  |
| REGRESSIVE BEHAVIOUR                      | 6.374 | 5.032 | 7.986  |
| OBSESSIVE THOUGHTS                        | 6.360 | 5.788 | 6.975  |
| ANTERIOR DISPLACED ANUS                   | 6.358 | 3.991 | 9.748  |
| BLOOD TRIGLYCERIDES                       | 6.348 | 4.721 | 8.392  |
| VASCULAR PARKINSONISM                     | 6.327 | 3.812 | 10.057 |
| REVERSIBLE SPLENIAL LESION SYNDROME       | 6.317 | 3.459 | 11.026 |
| PROLACTIN-PRODUCING PITUITARY TUMOUR      | 6.294 | 5.091 | 7.712  |
| DIABETES MELLITUS                         | 6.269 | 6.181 | 6.358  |
| ELECTROCARDIOGRAM QT INTERVAL ABNORMAL    | 6.250 | 5.096 | 7.600  |
| OVERWEIGHT                                | 6.245 | 5.866 | 6.644  |
| GRANULOCYTOSIS                            | 6.199 | 4.589 | 8.229  |
| DEPRESSIVE DELUSION                       | 6.195 | 3.734 | 9.832  |
| IRIS COLOBOMA                             | 6.179 | 4.322 | 8.621  |
| SCHIZOTYPAL PERSONALITY DISORDER          | 6.166 | 3.625 | 10.003 |
| HYPERPHAGIA                               | 6.141 | 5.729 | 6.575  |
| FLAT AFFECT                               | 6.110 | 5.620 | 6.634  |
| OBSESSIVE-COMPULSIVE PERSONALITY DISORDER | 6.105 | 4.686 | 7.845  |
| PARANOIA                                  | 6.074 | 5.905 | 6.247  |
| SYMPATHOMIMETIC EFFECT                    | 6.009 | 3.898 | 8.948  |
| DECREASED EYE CONTACT                     | 5.987 | 4.493 | 7.851  |
| NEOLOGISM                                 | 5.982 | 3.420 | 9.936  |
| COPROLALIA                                | 5.973 | 3.817 | 9.009  |
| ENURESIS                                  | 5.965 | 5.576 | 6.375  |
| AGRANULOCYTOSIS                           | 5.956 | 5.789 | 6.127  |
| MANGANESE DECREASED                       | 5.935 | 3.275 | 10.172 |
| MULTIPLE DRUG THERAPY                     | 5.921 | 4.529 | 7.632  |
| AKINESIA                                  | 5.919 | 5.468 | 6.400  |
| GRIMACING                                 | 5.905 | 5.136 | 6.763  |
| PHARYNGEAL DYSKINESIA                     | 5.900 | 3.111 | 10.572 |
| SCHIZOID PERSONALITY DISORDER             | 5.898 | 3.472 | 9.537  |
| TOTAL CHOLESTEROL/HDL RATIO INCREASED     | 5.872 | 4.367 | 7.761  |
| HALLUCINATIONS, MIXED                     | 5.855 | 5.433 | 6.302  |

|                                                       |       |       |       |
|-------------------------------------------------------|-------|-------|-------|
| TANGENTIALITY                                         | 5.854 | 4.446 | 7.595 |
| OROPHARYNGEAL SPASM                                   | 5.839 | 4.731 | 7.143 |
| DIET REFUSAL                                          | 5.835 | 5.057 | 6.706 |
| HYPERAMMONAEMIC ENCEPHALOPATHY                        | 5.830 | 5.184 | 6.538 |
| ABULIA                                                | 5.812 | 4.965 | 6.768 |
| FLOPPY INFANT                                         | 5.803 | 4.204 | 7.851 |
| LOSS OF EMPLOYMENT                                    | 5.772 | 5.378 | 6.189 |
| KLEPTOMANIA                                           | 5.769 | 3.842 | 8.395 |
| POVERTY OF SPEECH                                     | 5.752 | 4.628 | 7.082 |
| ELECTROCARDIOGRAM QT SHORTENED                        | 5.714 | 4.489 | 7.190 |
| VERBAL ABUSE                                          | 5.714 | 4.768 | 6.802 |
| PSYCHOTIC DISORDER DUE TO A GENERAL MEDICAL CONDITION | 5.684 | 4.092 | 7.731 |
| SEXUAL ACTIVITY INCREASED                             | 5.684 | 4.092 | 7.731 |
| LOGORRHOEA                                            | 5.664 | 5.285 | 6.063 |
| ILLNESS ANXIETY DISORDER                              | 5.662 | 4.564 | 6.960 |
| DYSTONIC TREMOR                                       | 5.655 | 3.333 | 9.129 |
| TIC                                                   | 5.636 | 5.326 | 5.961 |
| MEAN CELL VOLUME DECREASED                            | 5.635 | 4.977 | 6.360 |
| PSYCHIATRIC EVALUATION ABNORMAL                       | 5.622 | 3.113 | 9.568 |
| ELECTROCARDIOGRAM QT INTERVAL                         | 5.611 | 4.089 | 7.552 |
| BOREDOM                                               | 5.604 | 4.379 | 7.085 |
| AGITATED DEPRESSION                                   | 5.569 | 4.142 | 7.360 |
| ELECTROCARDIOGRAM QT PROLONGED                        | 5.568 | 5.433 | 5.706 |
| NEONATAL BEHAVIOURAL SYNDROME                         | 5.560 | 4.222 | 7.212 |
| SLEEP-RELATED EATING DISORDER                         | 5.542 | 4.797 | 6.375 |
| DELUSIONAL DISORDER, PERSECUTORY TYPE                 | 5.533 | 4.569 | 6.650 |
| KETONURIA                                             | 5.530 | 4.754 | 6.404 |
| MEAN CELL HAEMOGLOBIN DECREASED                       | 5.528 | 4.877 | 6.246 |
| SUICIDE ATTEMPT                                       | 5.512 | 5.418 | 5.608 |
| PERSISTENT DEPRESSIVE DISORDER                        | 5.502 | 4.697 | 6.412 |
| FRONTOTEMPORAL DEMENTIA                               | 5.499 | 4.361 | 6.859 |
| RESTLESSNESS                                          | 5.498 | 5.372 | 5.626 |
| INTESTINAL PSEUDO-OBSTRUCTION                         | 5.493 | 4.629 | 6.479 |
| PARANOID PERSONALITY DISORDER                         | 5.470 | 3.913 | 7.483 |
| DELUSIONAL DISORDER, EROTOMANIC TYPE                  | 5.454 | 3.126 | 9.004 |
| EPILEPTIC PSYCHOSIS                                   | 5.454 | 3.126 | 9.004 |
| PERSEVERATION                                         | 5.452 | 4.091 | 7.148 |
| IRREGULAR SLEEP WAKE RHYTHM DISORDER                  | 5.446 | 4.347 | 6.754 |
| TREMOR NEONATAL                                       | 5.439 | 4.571 | 6.432 |
| OPISTHOTONUS                                          | 5.435 | 4.833 | 6.095 |



|                                  |       |       |       |
|----------------------------------|-------|-------|-------|
| DISTURBANCE IN SOCIAL BEHAVIOUR  | 5.434 | 4.944 | 5.963 |
| HISTRIONIC PERSONALITY DISORDER  | 5.433 | 3.859 | 7.476 |
| PHYSICAL ASSAULT                 | 5.433 | 4.969 | 5.931 |
| PITUITARY TUMOUR BENIGN          | 5.431 | 4.889 | 6.019 |
| THOUGHT BLOCKING                 | 5.423 | 4.567 | 6.402 |
| NEPHROGENIC DIABETES INSIPIDUS   | 5.420 | 4.734 | 6.182 |
| DYSKINESIA                       | 5.417 | 5.303 | 5.533 |
| VERBIGERATION                    | 5.383 | 3.851 | 7.364 |
| RETROGRADE EJACULATION           | 5.344 | 4.491 | 6.319 |
| IMPAIRED FASTING GLUCOSE         | 5.340 | 4.138 | 6.804 |
| PHAGOPHOBIA                      | 5.338 | 3.060 | 8.807 |
| HYPOCHROMASIA                    | 5.333 | 3.907 | 7.142 |
| COMA SCALE ABNORMAL              | 5.329 | 4.872 | 5.819 |
| PSYCHOMOTOR SKILLS IMPAIRED      | 5.328 | 4.806 | 5.894 |
| MUSCLE TONE DISORDER             | 5.319 | 4.069 | 6.856 |
| HOMICIDAL IDEATION               | 5.315 | 4.992 | 5.655 |
| PSYCHIATRIC SYMPTOM              | 5.252 | 4.972 | 5.543 |
| BULIMIA NERVOSA                  | 5.246 | 4.338 | 6.299 |
| BUCCOGLOSSAL SYNDROME            | 5.237 | 4.584 | 5.961 |
| HEAD BANGING                     | 5.233 | 4.327 | 6.283 |
| BLOOD OSMOLARITY INCREASED       | 5.231 | 4.158 | 6.512 |
| ALCOHOL ABUSE                    | 5.219 | 4.762 | 5.709 |
| BENIGN NEOPLASM OF ADRENAL GLAND | 5.218 | 3.732 | 7.137 |
| HYPEROSMOLAR STATE               | 5.212 | 4.143 | 6.488 |
| DEPENDENT PERSONALITY DISORDER   | 5.185 | 3.756 | 7.014 |
| HERBAL INTERACTION               | 5.183 | 3.936 | 6.723 |
| AGGRESSION                       | 5.181 | 5.082 | 5.282 |
| CONVULSIVE THRESHOLD LOWERED     | 5.133 | 4.071 | 6.403 |
| EMOTIONAL DISORDER               | 5.128 | 5.022 | 5.236 |
| SUICIDE THREAT                   | 5.128 | 3.777 | 6.836 |
| ACTION TREMOR                    | 5.124 | 3.371 | 7.533 |
| ATTENTION-SEEKING BEHAVIOUR      | 5.118 | 3.729 | 6.888 |
| GENDER DYSPHORIA                 | 5.115 | 3.319 | 7.606 |
| REPETITIVE SPEECH                | 5.099 | 4.236 | 6.095 |
| MONOCYTE COUNT INCREASED         | 5.083 | 4.668 | 5.528 |
| GAZE PALSY                       | 5.078 | 4.511 | 5.699 |
| PATIENT RESTRAINT                | 5.078 | 3.133 | 7.878 |
| PARAPHILIA                       | 5.062 | 3.621 | 6.923 |
| SEDATION                         | 5.056 | 4.970 | 5.142 |
| EOSINOPHILIC PLEURAL EFFUSION    | 5.052 | 3.279 | 7.513 |
| SELF ESTEEM INFLATED             | 5.052 | 3.279 | 7.513 |

|                                              |       |       |       |
|----------------------------------------------|-------|-------|-------|
| GLUCOSE TOLERANCE IMPAIRED                   | 5.024 | 4.714 | 5.351 |
| BEZOAR                                       | 5.017 | 4.328 | 5.790 |
| SUICIDAL BEHAVIOUR                           | 5.003 | 4.640 | 5.388 |
| BELLIGERENCE                                 | 5.002 | 4.170 | 5.961 |
| PATIENT UNCOOPERATIVE                        | 4.998 | 3.598 | 6.797 |
| POSTURE ABNORMAL                             | 4.994 | 4.597 | 5.417 |
| STOMA SITE INFLAMMATION                      | 4.993 | 4.112 | 6.016 |
| ILLOGICAL THINKING                           | 4.971 | 3.662 | 6.626 |
| CATECHOLAMINES URINE INCREASED               | 4.969 | 3.310 | 7.227 |
| SUBGALEAL HAEMATOMA                          | 4.964 | 3.500 | 6.875 |
| HYPOTHERMIA                                  | 4.954 | 4.738 | 5.178 |
| INAPPROPRIATE AFFECT                         | 4.954 | 4.431 | 5.524 |
| ATHETOSIS                                    | 4.939 | 3.578 | 6.681 |
| EOSINOPHILIC MYOCARDITIS                     | 4.931 | 3.996 | 6.032 |
| SEROTONIN SYNDROME                           | 4.925 | 4.737 | 5.119 |
| ENDOCRINE DISORDER                           | 4.903 | 4.332 | 5.533 |
| HYPERTHERMIA MALIGNANT                       | 4.901 | 4.479 | 5.354 |
| GLOBULINS DECREASED                          | 4.882 | 3.679 | 6.377 |
| SOCIAL ANXIETY DISORDER                      | 4.855 | 4.142 | 5.661 |
| MEGACOLON                                    | 4.854 | 4.339 | 5.417 |
| ANTIDEPRESSANT DRUG LEVEL ABOVE THERAPEUTIC  | 4.852 | 3.574 | 6.467 |
| SELECTIVE MUTISM                             | 4.848 | 3.100 | 7.301 |
| DIABETIC COMPLICATION                        | 4.845 | 4.462 | 5.253 |
| SLOW RESPONSE TO STIMULI                     | 4.833 | 4.172 | 5.575 |
| ELECTROCARDIOGRAM REPOLARISATION ABNORMALITY | 4.820 | 4.084 | 5.658 |
| POVERTY OF THOUGHT CONTENT                   | 4.817 | 3.126 | 7.162 |
| DIABETIC EYE DISEASE                         | 4.806 | 3.785 | 6.033 |
| REFUSAL OF TREATMENT BY PATIENT              | 4.806 | 4.548 | 5.076 |
| SACCADIC EYE MOVEMENT                        | 4.793 | 3.405 | 6.595 |
| BREAST DISORDER MALE                         | 4.789 | 3.151 | 7.040 |
| TOE WALKING                                  | 4.789 | 3.151 | 7.040 |
| HYPERINSULINAEMIA                            | 4.765 | 3.669 | 6.104 |
| SELF-INJURIOUS IDEATION                      | 4.758 | 4.401 | 5.136 |
| LONG QT SYNDROME                             | 4.755 | 4.250 | 5.306 |
| CONFABULATION                                | 4.754 | 3.519 | 6.308 |
| POSTURING                                    | 4.754 | 4.010 | 5.603 |
| LEUKOCYTOSIS                                 | 4.753 | 4.622 | 4.887 |
| DEPRESSIVE SYMPTOM                           | 4.741 | 4.321 | 5.192 |
| STAB WOUND                                   | 4.741 | 3.627 | 6.111 |
| VISCERAL CONGESTION                          | 4.738 | 3.599 | 6.146 |
| HYPNOPOMPIC HALLUCINATION                    | 4.730 | 3.024 | 7.122 |

|                                                |       |       |       |
|------------------------------------------------|-------|-------|-------|
| STARING                                        | 4.708 | 4.297 | 5.150 |
| SOCIAL AVOIDANT BEHAVIOUR                      | 4.705 | 4.436 | 4.987 |
| MENTAL DISABILITY                              | 4.700 | 3.821 | 5.732 |
| BRIEF PSYCHOTIC DISORDER WITH MARKED STRESSORS | 4.699 | 3.166 | 6.768 |
| DISSOCIATIVE DISORDER                          | 4.674 | 3.818 | 5.676 |
| LABOUR COMPLICATION                            | 4.670 | 3.619 | 5.950 |
| MICROPTHALMOS                                  | 4.670 | 3.619 | 5.950 |
| ORTHOSTATIC HYPERTENSION                       | 4.669 | 3.677 | 5.861 |
| HYPOMETABOLISM                                 | 4.664 | 3.592 | 5.975 |
| AGITATION NEONATAL                             | 4.654 | 3.979 | 5.416 |
| DYSSOMNIA                                      | 4.647 | 3.386 | 6.253 |
| GLYCOSURIA                                     | 4.643 | 4.161 | 5.167 |
| CONSCIOUSNESS FLUCTUATING                      | 4.638 | 3.939 | 5.432 |
| LOSS OF DREAMING                               | 4.638 | 3.052 | 6.817 |
| FLASHBACK                                      | 4.631 | 3.843 | 5.542 |
| SUSPECTED SUICIDE                              | 4.631 | 4.038 | 5.292 |
| DELIRIUM                                       | 4.627 | 4.510 | 4.746 |
| MYOTONIA                                       | 4.618 | 3.365 | 6.215 |
| OPPOSITIONAL DEFIANT DISORDER                  | 4.615 | 3.643 | 5.781 |
| ELECTROCARDIOGRAM T WAVE ABNORMAL              | 4.587 | 4.085 | 5.137 |
| MACROSOMIA                                     | 4.580 | 3.492 | 5.922 |
| FAECAL VOMITING                                | 4.579 | 3.588 | 5.774 |
| LOCKED-IN SYNDROME                             | 4.568 | 3.606 | 5.722 |
| HYPOTONIA NEONATAL                             | 4.566 | 4.068 | 5.111 |
| DISORGANISED SPEECH                            | 4.565 | 3.821 | 5.418 |
| TROPONIN T INCREASED                           | 4.556 | 3.919 | 5.273 |
| DROP ATTACKS                                   | 4.548 | 3.736 | 5.493 |
| POSTURAL TREMOR                                | 4.544 | 3.153 | 6.383 |
| ENCOPRESIS                                     | 4.540 | 3.289 | 6.141 |
| BRUXISM                                        | 4.539 | 4.239 | 4.855 |
| MENTAL DISORDER                                | 4.536 | 4.425 | 4.649 |
| DISSOCIATIVE AMNESIA                           | 4.531 | 3.320 | 6.067 |
| IMPAIRED SELF-CARE                             | 4.518 | 4.073 | 5.001 |
| TREATMENT NONCOMPLIANCE                        | 4.517 | 4.414 | 4.622 |
| SPLEEN CONGESTION                              | 4.505 | 3.409 | 5.864 |
| DIABETES INSIPIDUS                             | 4.504 | 4.101 | 4.939 |
| ANTISOCIAL BEHAVIOUR                           | 4.499 | 3.905 | 5.162 |
| BLOOD TRIGLYCERIDES INCREASED                  | 4.499 | 4.352 | 4.649 |
| FOETAL ALCOHOL SYNDROME                        | 4.485 | 3.022 | 6.460 |
| JUDGEMENT IMPAIRED                             | 4.483 | 3.964 | 5.053 |
| GASTROINTESTINAL HYPOMOTILITY                  | 4.474 | 3.944 | 5.058 |

|                                               |       |       |       |
|-----------------------------------------------|-------|-------|-------|
| MIOSIS                                        | 4.473 | 4.215 | 4.743 |
| HEPATITIS VIRAL                               | 4.462 | 3.807 | 5.203 |
| MEAN CELL HAEMOGLOBIN CONCENTRATION DECREASED | 4.456 | 3.830 | 5.161 |
| HYPERTONIA NEONATAL                           | 4.441 | 3.559 | 5.486 |
| EXCESSIVE EYE BLINKING                        | 4.437 | 3.900 | 5.031 |
| BRUGADA SYNDROME                              | 4.432 | 3.742 | 5.219 |
| EMBOLISM VENOUS                               | 4.414 | 4.007 | 4.853 |
| SUBSTANCE USE                                 | 4.410 | 3.688 | 5.239 |
| NOREPINEPHRINE INCREASED                      | 4.405 | 3.029 | 6.235 |
| XANTHOMA                                      | 4.403 | 3.260 | 5.843 |
| HYPORESPONSIVE TO STIMULI                     | 4.374 | 3.616 | 5.251 |
| PERIPARTUM CARDIOMYOPATHY                     | 4.369 | 3.004 | 6.185 |
| WHITE BLOOD CELL COUNT INCREASED              | 4.368 | 4.264 | 4.473 |
| ILLUSION                                      | 4.364 | 3.852 | 4.929 |
| TONGUE PARALYSIS                              | 4.346 | 3.688 | 5.093 |
| KIDNEY DUPLEX                                 | 4.313 | 3.042 | 5.973 |
| STOMA SITE HYPERGRANULATION                   | 4.306 | 3.346 | 5.471 |
| DIABETIC KETOACIDOSIS                         | 4.300 | 4.162 | 4.441 |
| HEAT STROKE                                   | 4.294 | 3.763 | 4.882 |
| ABNORMAL BEHAVIOUR                            | 4.285 | 4.189 | 4.382 |
| TRISMUS                                       | 4.285 | 4.023 | 4.560 |
| BEHAVIOUR DISORDER                            | 4.284 | 3.744 | 4.885 |
| BLOOD CHOLESTEROL ABNORMAL                    | 4.274 | 3.952 | 4.616 |
| AUTOSCOPY                                     | 4.272 | 3.178 | 5.646 |
| PICKWICKIAN SYNDROME                          | 4.260 | 3.026 | 5.862 |
| AUTONOMIC NERVOUS SYSTEM IMBALANCE            | 4.256 | 3.839 | 4.708 |
| FAECALOMA                                     | 4.247 | 3.959 | 4.551 |
| ELECTROCARDIOGRAM PR SHORTENED                | 4.244 | 3.056 | 5.772 |
| FLOPPY IRIS SYNDROME                          | 4.229 | 3.322 | 5.321 |
| BLOOD UREA DECREASED                          | 4.210 | 3.703 | 4.770 |
| AGITATION                                     | 4.209 | 4.142 | 4.277 |
| MYXOEDEMA COMA                                | 4.204 | 3.112 | 5.579 |
| PNEUMONIA ASPIRATION                          | 4.203 | 4.067 | 4.343 |
| COMPLETED SUICIDE                             | 4.197 | 4.123 | 4.271 |
| POST-TRAUMATIC STRESS DISORDER                | 4.188 | 3.892 | 4.501 |
| HYPONATRAEMIC SYNDROME                        | 4.184 | 3.049 | 5.631 |
| DRUG LEVEL INCREASED                          | 4.173 | 3.998 | 4.354 |
| INCREASED APPETITE                            | 4.172 | 4.025 | 4.323 |
| FOETAL MACROSOMIA                             | 4.161 | 3.033 | 5.600 |
| PARKINSON'S DISEASE                           | 4.160 | 3.993 | 4.333 |
| ASOCIAL BEHAVIOUR                             | 4.148 | 3.184 | 5.329 |

|                                              |       |       |       |
|----------------------------------------------|-------|-------|-------|
| INTENTIONAL OVERDOSE                         | 4.147 | 4.068 | 4.227 |
| LARGE FOR DATES BABY                         | 4.147 | 3.475 | 4.918 |
| COMMUNICATION DISORDER                       | 4.145 | 3.813 | 4.500 |
| GLOSSOPTOSIS                                 | 4.139 | 3.016 | 5.569 |
| NEURODEGENERATIVE DISORDER                   | 4.128 | 3.308 | 5.100 |
| NEONATAL RESPIRATORY DEPRESSION              | 4.125 | 3.206 | 5.242 |
| ALCOHOL PROBLEM                              | 4.107 | 3.082 | 5.384 |
| HYPERPITUITARISM                             | 4.107 | 3.082 | 5.384 |
| SINUS TACHYCARDIA                            | 4.107 | 3.937 | 4.283 |
| WEIGHT INCREASED                             | 4.102 | 4.059 | 4.146 |
| DYSLIPIDAEMIA                                | 4.091 | 3.781 | 4.420 |
| HALLUCINATION, TACTILE                       | 4.087 | 3.306 | 5.007 |
| WOLFF-PARKINSON-WHITE SYNDROME               | 4.078 | 3.262 | 5.048 |
| LYMPHOCYTE PERCENTAGE INCREASED              | 4.075 | 3.193 | 5.139 |
| BLOOD CREATINE PHOSPHOKINASE INCREASED       | 4.064 | 3.968 | 4.162 |
| TRANCE                                       | 4.035 | 3.162 | 5.089 |
| HYPERREFLEXIA                                | 4.030 | 3.713 | 4.369 |
| BRADYPHRENIA                                 | 4.020 | 3.744 | 4.312 |
| ALCOHOL WITHDRAWAL SYNDROME                  | 3.991 | 3.387 | 4.677 |
| SUICIDAL IDEATION                            | 3.990 | 3.922 | 4.059 |
| VIOLENCE-RELATED SYMPTOM                     | 3.990 | 3.521 | 4.506 |
| HYPERTHERMIA                                 | 3.986 | 3.733 | 4.252 |
| STOMA SITE DISCHARGE                         | 3.983 | 3.489 | 4.530 |
| AGORAPHOBIA                                  | 3.949 | 3.429 | 4.529 |
| LIP EROSION                                  | 3.949 | 3.244 | 4.770 |
| ENCEPHALITIS AUTOIMMUNE                      | 3.947 | 3.198 | 4.828 |
| INDIFFERENCE                                 | 3.945 | 3.262 | 4.736 |
| STOMA SITE ERYTHEMA                          | 3.924 | 3.346 | 4.579 |
| FOOD CRAVING                                 | 3.906 | 3.570 | 4.265 |
| TROPONIN INCREASED                           | 3.882 | 3.610 | 4.170 |
| TONGUE BITING                                | 3.878 | 3.450 | 4.347 |
| ELECTROCARDIOGRAM T WAVE AMPLITUDE DECREASED | 3.877 | 3.102 | 4.799 |
| DEREALISATION                                | 3.875 | 3.412 | 4.385 |
| HALLUCINATION, VISUAL                        | 3.870 | 3.717 | 4.029 |
| MENTAL IMPAIRMENT                            | 3.869 | 3.744 | 3.996 |
| STUPOR                                       | 3.833 | 3.656 | 4.016 |
| DISABILITY                                   | 3.820 | 3.633 | 4.015 |
| ELECTROENCEPHALOGRAM ABNORMAL                | 3.818 | 3.588 | 4.060 |
| TOBACCO ABUSE                                | 3.814 | 3.080 | 4.681 |
| MONOCYTE COUNT DECREASED                     | 3.812 | 3.242 | 4.458 |
| CHOREA                                       | 3.807 | 3.348 | 4.315 |

|                                 |       |       |       |
|---------------------------------|-------|-------|-------|
| EYE MOVEMENT DISORDER           | 3.806 | 3.594 | 4.028 |
| EOSINOPHIL COUNT INCREASED      | 3.804 | 3.570 | 4.049 |
| SELECTIVE EATING DISORDER       | 3.802 | 3.434 | 4.201 |
| BASOPHIL COUNT INCREASED        | 3.797 | 3.060 | 4.667 |
| SOMATIC SYMPTOM DISORDER        | 3.789 | 3.312 | 4.318 |
| HOMICIDE                        | 3.786 | 3.384 | 4.225 |
| HYPERNATRAEMIA                  | 3.772 | 3.500 | 4.060 |
| APRAXIA                         | 3.767 | 3.255 | 4.340 |
| GASTROINTESTINAL SURGERY        | 3.762 | 3.058 | 4.588 |
| LIBIDO INCREASED                | 3.762 | 3.429 | 4.119 |
| AFFECTIVE DISORDER              | 3.759 | 3.520 | 4.009 |
| VASCULAR DEMENTIA               | 3.751 | 3.113 | 4.488 |
| PSYCHOMOTOR HYPERACTIVITY       | 3.750 | 3.605 | 3.901 |
| POISONING DELIBERATE            | 3.743 | 3.398 | 4.115 |
| PAROTID GLAND ENLARGEMENT       | 3.728 | 3.229 | 4.286 |
| LIPIDS INCREASED                | 3.727 | 3.290 | 4.208 |
| LYMPHOCYTE COUNT INCREASED      | 3.723 | 3.373 | 4.101 |
| FACIAL SPASM                    | 3.706 | 3.129 | 4.364 |
| INSULIN RESISTANCE              | 3.698 | 3.256 | 4.185 |
| SUDDEN DEATH                    | 3.693 | 3.536 | 3.857 |
| CIRCADIAN RHYTHM SLEEP DISORDER | 3.679 | 3.030 | 4.433 |
| PANCREATITIS CHRONIC            | 3.675 | 3.283 | 4.103 |
| ORTHOSTATIC HYPOTENSION         | 3.674 | 3.539 | 3.814 |
| ALTERED STATE OF CONSCIOUSNESS  | 3.662 | 3.509 | 3.819 |
| ON AND OFF PHENOMENON           | 3.643 | 3.245 | 4.079 |
| DROWNING                        | 3.638 | 3.092 | 4.258 |
| MYOCLONUS                       | 3.634 | 3.454 | 3.822 |
| DYSARTHRIA                      | 3.631 | 3.533 | 3.731 |
| RESPIRATORY DISORDER NEONATAL   | 3.631 | 3.115 | 4.213 |
| NUCHAL RIGIDITY                 | 3.628 | 3.021 | 4.328 |
| GENERALISED ANXIETY DISORDER    | 3.601 | 3.081 | 4.188 |
| BREAST ENGORGEMENT              | 3.594 | 3.037 | 4.229 |
| APATHY                          | 3.587 | 3.432 | 3.748 |
| PRESCRIBED OVERDOSE             | 3.584 | 3.421 | 3.752 |
| SEXUAL DYSFUNCTION              | 3.572 | 3.393 | 3.758 |
| ALCOHOL POISONING               | 3.530 | 3.182 | 3.907 |
| HOSPITALISATION                 | 3.509 | 3.450 | 3.569 |
| INJURY                          | 3.506 | 3.441 | 3.572 |
| LEUKOPENIA                      | 3.500 | 3.433 | 3.568 |
| SYRINGE ISSUE                   | 3.487 | 3.266 | 3.720 |
| ASPIRATION                      | 3.466 | 3.287 | 3.652 |

|                                  |       |       |       |
|----------------------------------|-------|-------|-------|
| RESTLESS LEGS SYNDROME           | 3.454 | 3.308 | 3.604 |
| HALLUCINATION                    | 3.439 | 3.373 | 3.505 |
| MAJOR DEPRESSION                 | 3.422 | 3.245 | 3.606 |
| BUNDLE BRANCH BLOCK RIGHT        | 3.402 | 3.153 | 3.666 |
| BRAIN INJURY                     | 3.401 | 3.203 | 3.608 |
| NEUTROPHIL COUNT DECREASED       | 3.371 | 3.263 | 3.481 |
| PANIC DISORDER                   | 3.357 | 3.076 | 3.658 |
| PANCREATITIS                     | 3.334 | 3.261 | 3.409 |
| HYPERAMMONAEMIA                  | 3.297 | 3.024 | 3.589 |
| ILEUS PARALYTIC                  | 3.272 | 3.058 | 3.498 |
| DEPRESSED LEVEL OF CONSCIOUSNESS | 3.266 | 3.175 | 3.360 |
| HOSTILITY                        | 3.223 | 3.063 | 3.389 |
| COMA                             | 3.215 | 3.144 | 3.288 |
| URINARY INCONTINENCE             | 3.202 | 3.108 | 3.299 |
| PLATELET COUNT INCREASED         | 3.182 | 3.013 | 3.359 |
| ECONOMIC PROBLEM                 | 3.178 | 3.051 | 3.309 |
| MUSCLE TWITCHING                 | 3.103 | 3.000 | 3.208 |
